# Supplementary material
Source: MDPI journal article supplement (https://www.mdpi.com/2227-7390/9/24/3302)
Supplement: s1 [file s1]

## Supplementary Materials

In this section, appendix for Hierarchical Quasi Fractional Gradient Descent Method for Parameter Estimation of Nonlinear ARX Systems using Key Term Separation Principle is given in terms of Tables.

Results of fitness adaptation of the HQFGD are given in Supplementary Tables S1, S2 and S3 for 0.02, 0.09 and 0.2 noise level respectively.

**Table S1.** Fitness adaptation of the HQFGD for 0.02 noise level and 0.0005 step size.

| $t$   | $\mu = 0.7$ | $\mu = 0.8$ | $\mu = 0.9$ | $\mu = 1$ | $\mu = 1.1$ | $\mu = 1.2$ |
|-------|-------------|-------------|-------------|-----------|-------------|-------------|
| 1000  | 0.46252     | 0.46203     | 0.47164     | 0.48775   | 0.50968     | 0.53759     |
| 2000  | 0.23824     | 0.24016     | 0.24891     | 0.26302   | 0.28297     | 0.31001     |
| 3000  | 0.14211     | 0.14555     | 0.15151     | 0.16019   | 0.17255     | 0.19009     |
| 4000  | 0.10153     | 0.10505     | 0.10975     | 0.11609   | 0.12474     | 0.13669     |
| 5000  | 0.07699     | 0.08021     | 0.08451     | 0.09029   | 0.09806     | 0.10844     |
| 6000  | 0.05841     | 0.06123     | 0.06511     | 0.07042   | 0.07757     | 0.08710     |
| 7000  | 0.04508     | 0.04753     | 0.05103     | 0.05590   | 0.06258     | 0.07155     |
| 8000  | 0.03425     | 0.03633     | 0.03938     | 0.04373   | 0.04979     | 0.05810     |
| 9000  | 0.02561     | 0.02734     | 0.02995     | 0.03373   | 0.03910     | 0.04661     |
| 10000 | 0.01964     | 0.02109     | 0.02331     | 0.02659   | 0.03132     | 0.03806     |
| 11000 | 0.01467     | 0.01585     | 0.01770     | 0.02046   | 0.02452     | 0.03042     |
| 12000 | 0.01130     | 0.01227     | 0.01382     | 0.01616   | 0.01965     | 0.02484     |
| 13000 | 0.00850     | 0.00926     | 0.01050     | 0.01241   | 0.01530     | 0.01970     |
| 14000 | 0.00638     | 0.00699     | 0.00799     | 0.00955   | 0.01196     | 0.01569     |
| 15000 | 0.00474     | 0.00523     | 0.00604     | 0.00732   | 0.00932     | 0.01249     |
| 16000 | 0.00373     | 0.00412     | 0.00477     | 0.00582   | 0.00749     | 0.01017     |
| 17000 | 0.00283     | 0.00315     | 0.00368     | 0.00455   | 0.00594     | 0.00823     |
| 18000 | 0.00218     | 0.00243     | 0.00286     | 0.00355   | 0.00470     | 0.00660     |
| 19000 | 0.00172     | 0.00191     | 0.00224     | 0.00280   | 0.00373     | 0.00532     |
| 20000 | 0.00122     | 0.00137     | 0.00164     | 0.00210   | 0.00287     | 0.00421     |
| 21000 | 0.00101     | 0.00113     | 0.00134     | 0.00170   | 0.00233     | 0.00343     |
| 22000 | 0.00078     | 0.00087     | 0.00104     | 0.00134   | 0.00186     | 0.00279     |
| 23000 | 0.00067     | 0.00074     | 0.00086     | 0.00109   | 0.00151     | 0.00227     |
| 24000 | 0.00057     | 0.00062     | 0.00072     | 0.00090   | 0.00123     | 0.00185     |
| 25000 | 0.00027     | 0.00031     | 0.00039     | 0.00054   | 0.00082     | 0.00135     |
| 26000 | 0.00029     | 0.00029     | 0.00031     | 0.00039   | 0.00057     | 0.00099     |
| 27000 | 0.00045     | 0.00046     | 0.00048     | 0.00053   | 0.00067     | 0.00099     |
| 28000 | 0.00041     | 0.00041     | 0.00040     | 0.00041   | 0.00047     | 0.00070     |
| 29000 | 0.00045     | 0.00044     | 0.00044     | 0.00044   | 0.00048     | 0.00063     |
| 30000 | 0.00036     | 0.00035     | 0.00033     | 0.00030   | 0.00030     | 0.00041     |

**Table S2.** Fitness adaptation of the HQFGD for 0.09 noise level and 0.0005 step size.

| $t$          | $\mu = 0.7$ | $\mu = 0.8$ | $\mu = 0.9$ | $\mu = 1$ | $\mu = 1.1$ | $\mu = 1.2$ |
|--------------|-------------|-------------|-------------|-----------|-------------|-------------|
| <b>1000</b>  | 0.46238     | 0.46196     | 0.47162     | 0.48776   | 0.50970     | 0.53761     |
| <b>2000</b>  | 0.23884     | 0.24080     | 0.24960     | 0.26374   | 0.28372     | 0.31077     |
| <b>3000</b>  | 0.14206     | 0.14551     | 0.15148     | 0.16019   | 0.17258     | 0.19016     |
| <b>4000</b>  | 0.10093     | 0.10445     | 0.10916     | 0.11550   | 0.12415     | 0.13610     |
| <b>5000</b>  | 0.07699     | 0.08020     | 0.08450     | 0.09029   | 0.09805     | 0.10844     |
| <b>6000</b>  | 0.05893     | 0.06172     | 0.06559     | 0.07089   | 0.07804     | 0.08757     |
| <b>7000</b>  | 0.04519     | 0.04762     | 0.05112     | 0.05600   | 0.06268     | 0.07168     |
| <b>8000</b>  | 0.03469     | 0.03675     | 0.03979     | 0.04413   | 0.05018     | 0.05848     |
| <b>9000</b>  | 0.02600     | 0.02771     | 0.03031     | 0.03407   | 0.03942     | 0.04692     |
| <b>10000</b> | 0.01994     | 0.02137     | 0.02359     | 0.02686   | 0.03158     | 0.03831     |
| <b>11000</b> | 0.01503     | 0.01620     | 0.01803     | 0.02078   | 0.02483     | 0.03072     |
| <b>12000</b> | 0.01180     | 0.01275     | 0.01427     | 0.01659   | 0.02006     | 0.02522     |
| <b>13000</b> | 0.00953     | 0.01026     | 0.01146     | 0.01332   | 0.01616     | 0.02050     |
| <b>14000</b> | 0.00735     | 0.00793     | 0.00890     | 0.01043   | 0.01280     | 0.01648     |
| <b>15000</b> | 0.00551     | 0.00598     | 0.00677     | 0.00802   | 0.01000     | 0.01314     |
| <b>16000</b> | 0.00485     | 0.00521     | 0.00582     | 0.00681   | 0.00842     | 0.01105     |
| <b>17000</b> | 0.00363     | 0.00392     | 0.00443     | 0.00526   | 0.00663     | 0.00888     |
| <b>18000</b> | 0.00288     | 0.00311     | 0.00352     | 0.00421   | 0.00534     | 0.00723     |
| <b>19000</b> | 0.00254     | 0.00271     | 0.00302     | 0.00355   | 0.00445     | 0.00600     |
| <b>20000</b> | 0.00188     | 0.00201     | 0.00224     | 0.00265   | 0.00338     | 0.00468     |
| <b>21000</b> | 0.00169     | 0.00179     | 0.00196     | 0.00228   | 0.00286     | 0.00393     |
| <b>22000</b> | 0.00137     | 0.00144     | 0.00158     | 0.00184   | 0.00232     | 0.00321     |
| <b>23000</b> | 0.00141     | 0.00145     | 0.00154     | 0.00171   | 0.00205     | 0.00275     |
| <b>24000</b> | 0.00138     | 0.00141     | 0.00147     | 0.00159   | 0.00185     | 0.00240     |
| <b>25000</b> | 0.00066     | 0.00067     | 0.00069     | 0.00077   | 0.00097     | 0.00145     |
| <b>26000</b> | 0.00111     | 0.00108     | 0.00104     | 0.00098   | 0.00096     | 0.00112     |
| <b>27000</b> | 0.00144     | 0.00143     | 0.00142     | 0.00142   | 0.00146     | 0.00162     |
| <b>28000</b> | 0.00147     | 0.00145     | 0.00140     | 0.00134   | 0.00127     | 0.00126     |
| <b>29000</b> | 0.00155     | 0.00154     | 0.00151     | 0.00146   | 0.00141     | 0.00138     |
| <b>30000</b> | 0.00131     | 0.00127     | 0.00121     | 0.00113   | 0.00102     | 0.00090     |

**Table S3.** Fitness adaptation of the HQFGD for 0.2 noise level and 0.0005 step size.

| $t$          | $\mu = 0.7$ | $\mu = 0.8$ | $\mu = 0.9$ | $\mu = 1$ | $\mu = 1.1$ | $\mu = 1.2$ |
|--------------|-------------|-------------|-------------|-----------|-------------|-------------|
| <b>1000</b>  | 0.45840     | 0.45801     | 0.46778     | 0.48404   | 0.50611     | 0.53418     |
| <b>2000</b>  | 0.23566     | 0.23767     | 0.24654     | 0.26073   | 0.28075     | 0.30785     |
| <b>3000</b>  | 0.13826     | 0.14164     | 0.14758     | 0.15624   | 0.16857     | 0.18608     |
| <b>4000</b>  | 0.09641     | 0.09993     | 0.10457     | 0.11078   | 0.11925     | 0.13096     |
| <b>5000</b>  | 0.07465     | 0.07775     | 0.08193     | 0.08757   | 0.09515     | 0.10532     |
| <b>6000</b>  | 0.05821     | 0.06089     | 0.06462     | 0.06973   | 0.07666     | 0.08593     |
| <b>7000</b>  | 0.04352     | 0.04588     | 0.04927     | 0.05401   | 0.06053     | 0.06932     |
| <b>8000</b>  | 0.03431     | 0.03627     | 0.03918     | 0.04333   | 0.04915     | 0.05716     |
| <b>9000</b>  | 0.02572     | 0.02734     | 0.02982     | 0.03342   | 0.03855     | 0.04576     |
| <b>10000</b> | 0.01961     | 0.02096     | 0.02308     | 0.02621   | 0.03074     | 0.03723     |
| <b>11000</b> | 0.01507     | 0.01614     | 0.01787     | 0.02048   | 0.02433     | 0.02998     |
| <b>12000</b> | 0.01257     | 0.01340     | 0.01477     | 0.01689   | 0.02011     | 0.02496     |
| <b>13000</b> | 0.01196     | 0.01254     | 0.01355     | 0.01517   | 0.01771     | 0.02167     |
| <b>14000</b> | 0.00943     | 0.00993     | 0.01078     | 0.01213   | 0.01426     | 0.01764     |
| <b>15000</b> | 0.00774     | 0.00810     | 0.00875     | 0.00981   | 0.01155     | 0.01438     |
| <b>16000</b> | 0.00830     | 0.00854     | 0.00898     | 0.00973   | 0.01103     | 0.01325     |
| <b>17000</b> | 0.00608     | 0.00628     | 0.00665     | 0.00731   | 0.00845     | 0.01041     |
| <b>18000</b> | 0.00465     | 0.00482     | 0.00517     | 0.00578   | 0.00680     | 0.00852     |
| <b>19000</b> | 0.00489     | 0.00500     | 0.00521     | 0.00560   | 0.00631     | 0.00763     |
| <b>20000</b> | 0.00417     | 0.00425     | 0.00439     | 0.00466   | 0.00518     | 0.00621     |
| <b>21000</b> | 0.00355     | 0.00360     | 0.00369     | 0.00389   | 0.00431     | 0.00516     |
| <b>22000</b> | 0.00315     | 0.00318     | 0.00326     | 0.00343   | 0.00376     | 0.00444     |
| <b>23000</b> | 0.00351     | 0.00352     | 0.00353     | 0.00359   | 0.00376     | 0.00420     |
| <b>24000</b> | 0.00361     | 0.00362     | 0.00363     | 0.00366   | 0.00377     | 0.00409     |
| <b>25000</b> | 0.00199     | 0.00196     | 0.00193     | 0.00189   | 0.00190     | 0.00207     |
| <b>26000</b> | 0.00358     | 0.00351     | 0.00340     | 0.00323   | 0.00301     | 0.00276     |
| <b>27000</b> | 0.00400     | 0.00396     | 0.00391     | 0.00384   | 0.00376     | 0.00374     |
| <b>28000</b> | 0.00436     | 0.00433     | 0.00422     | 0.00405   | 0.00383     | 0.00357     |
| <b>29000</b> | 0.00433     | 0.00430     | 0.00422     | 0.00410   | 0.00393     | 0.00371     |
| <b>30000</b> | 0.00373     | 0.00363     | 0.00348     | 0.00327   | 0.00301     | 0.00268     |
